# Supplementary material for: Combined analyses of kinship and FST suggest potential drivers of chaotic genetic patchiness in high gene-flow populations
Source: PubMed Central journal article supplement (PMC3749441; doi:10.1111/mec.12341), 2013-06-26
Supplement: mec0022-3476-SD1.pdf [file mec0022-3476-SD1.pdf]

Table S1. Isolation by distance (IBD) results from Mantel tests conducted in GenoDive 2.0b20 to examine patterns of genetic differentiation across multiple spatial scales based on sampling locations: All sites, only California sites, only Mexico sites, only continental sites, and only island sites. Data reported include the marker used (Marker), the metric used (Metric), the IBD equation (Equation), the number of sites included in the analysis (N-sites), the error sum of squares (Error SS), the total sum of squares (Total SS), the r-squared value ( $R^2$ ), and the  $P$ -value ( $P$ -value). Although there is one significant comparison (\*), this was not significant after correcting for multiple comparisons.

| Sample Sites           | Marker               | Metric               | Equation                   | N-sites | Error SS | Total SS | $R^2$ | $P$ -value |
|------------------------|----------------------|----------------------|----------------------------|---------|----------|----------|-------|------------|
| All Sites              | Microsatellites      | Jost $D_{est\_Chao}$ | $Y = 0.051 + (-0.004 * X)$ | 17      | 0.125    | 0.126    | 0.009 | 0.198      |
|                        |                      | $F_{ST}$             | $Y = 0.007 + (-0.000 * X)$ | 17      | 0.002    | 0.002    | 0.011 | 0.177      |
|                        | Cytochrome Oxidase I | Jost $D_{est\_Chao}$ | $Y = 0.063 + (-0.006 * X)$ | 17      | 1.094    | 1.097    | 0.003 | 0.330      |
|                        |                      | $\Phi_{ST}$          | $Y = -0.002 + (0.001 * X)$ | 17      | 0.014    | 0.014    | 0.012 | 0.154      |
| California Sites Only  | Microsatellites      | Jost $D_{est\_Chao}$ | $Y = 0.022 + (0.000 * X)$  | 7       | 0.004    | 0.004    | 0     | 0.470      |
|                        |                      | $F_{ST}$             | $Y = 0.002 + (0.000 * X)$  | 7       | 0        | 0        | 0.002 | 0.401      |
|                        | Cytochrome Oxidase I | Jost $D_{est\_Chao}$ | $Y = 0.052 + (0.002 * X)$  | 7       | 0.168    | 0.168    | 0     | 0.416      |
|                        |                      | $\Phi_{ST}$          | $Y = 0.006 + (0.000 * X)$  | 7       | 0.001    | 0.001    | 0     | 0.477      |
| Mexico Sites Only      | Microsatellites      | Jost $D_{est\_Chao}$ | $Y = 0.071 + (-0.006 * X)$ | 10      | 0.065    | 0.066    | 0.017 | 0.266      |
|                        |                      | $F_{ST}$             | $Y = 0.009 + (-0.001 * X)$ | 10      | 0.001    | 0.001    | 0.018 | 0.256      |
|                        | Cytochrome Oxidase I | Jost $D_{est\_Chao}$ | $Y = -0.009 + (0.003 * X)$ | 10      | 0.227    | 0.227    | 0.001 | 0.433      |
|                        |                      | $\Phi_{ST}$          | $Y = -0.010 + (0.003 * X)$ | 10      | 0.007    | 0.007    | 0.039 | 0.126      |
| Continental Sites Only | Microsatellites      | Jost $D_{est\_Chao}$ | $Y = 0.070 + (-0.005 * X)$ | 10      | 0.058    | 0.058    | 0.014 | 0.282      |
|                        |                      | $F_{ST}$             | $Y = 0.009 + (-0.001 * X)$ | 10      | 0.001    | 0.001    | 0.014 | 0.278      |
|                        | Cytochrome Oxidase I | Jost $D_{est\_Chao}$ | $Y = -0.073 + (0.013 * X)$ | 10      | 0.162    | 0.167    | 0.030 | 0.178      |
|                        |                      | $\Phi_{ST}$          | $Y = -0.015 + (0.004 * X)$ | 10      | 0.007    | 0.007    | 0.075 | 0.063      |
| Island Sites Only      | Microsatellites      | Jost $D_{est\_Chao}$ | $Y = 0.057 + (-0.008 * X)$ | 7       | 0.004    | 0.005    | 0.094 | 0.108      |
|                        |                      | $F_{ST}$             | $Y = 0.008 + (-0.001 * X)$ | 7       | 0        | 0        | 0.093 | 0.111      |
|                        | Cytochrome Oxidase I | Jost $D_{est\_Chao}$ | $Y = -0.050 + (0.026 * X)$ | 7       | 0.301    | 0.306    | 0.017 | 0.300      |
|                        |                      | $\Phi_{ST}$          | $Y = 0.020 + (-0.003 * X)$ | 7       | 0        | 0        | 0.258 | 0.022*     |

Table S2. Locus-specific diversity indices and  $F_{ST}$  values as calculated in GenoDive for each of the seven nuclear microsatellite loci, and null allele frequency for each microsatellite locus as calculated in *ML-Relate*. Metrics included are the total number of alleles for each locus (N), effective number of alleles for each locus ( $A_{eff}$ ), observed heterozygosity ( $H_o$ ), within-population heterozygosity ( $H_s$ ), total heterozygosity ( $H_t$ ),  $F_{ST}$  ( $F_{ST}$ ), significance test for  $F_{ST}$  ( $P$ -value ( $F_{ST}$ )) based on 100,000 permutations in GenoDive, percentage of genotyping error (% Genotyping Error), percentage of null alleles (% Null Alleles), and the  $P$ -value from a Monte-Carlo randomization test (20,000 randomizations) of whether the null-allele frequency is significant ( $P$ -value (NA)).

| <b>Locus</b>  | <b>N</b> | <b><math>A_{eff}</math></b> | <b><math>H_o</math></b> | <b><math>H_s</math></b> | <b><math>H_t</math></b> | <b><math>F_{ST}</math></b> | <b><math>P</math>-value (<math>F_{ST}</math>)</b> | <b>% Genotyping Error</b> | <b>% Null Alleles</b> | <b><math>P</math>-value (NA)</b> |
|---------------|----------|-----------------------------|-------------------------|-------------------------|-------------------------|----------------------------|---------------------------------------------------|---------------------------|-----------------------|----------------------------------|
| <b>A110</b>   | 5        | 2.203                       | 0.497                   | 0.552                   | 0.552                   | 0.001                      | 0.296                                             | 0.00%                     | 3.69%                 | 0.0035                           |
| <b>A5</b>     | 35       | 11.412                      | 0.943                   | 0.921                   | 0.924                   | 0.003                      | 0.002                                             | 1.35%                     | 0.00%                 | 0.3612                           |
| <b>A102r</b>  | 37       | 13.084                      | 0.875                   | 0.933                   | 0.935                   | 0.003                      | 0.010                                             | 4.05%                     | 3.10%                 | 0.0001                           |
| <b>pin244</b> | 104      | 23.301                      | 0.909                   | 0.967                   | 0.970                   | 0.004                      | < 0.0005                                          | 2.70%                     | 2.95%                 | < 0.00005                        |
| <b>pin29L</b> | 75       | 23.036                      | 0.842                   | 0.967                   | 0.969                   | 0.002                      | 0.002                                             | 4.05%                     | 6.63%                 | < 0.00005                        |
| <b>pin10</b>  | 35       | 10.137                      | 0.897                   | 0.911                   | 0.920                   | 0.011                      | < 0.0005                                          | 1.35%                     | 1.20%                 | 0.0098                           |
| <b>pin189</b> | 41       | 14.852                      | 0.858                   | 0.943                   | 0.944                   | 0.002                      | 0.023                                             | 2.70%                     | 4.60%                 | < 0.00005                        |

Table S3. Comparison of *ML-Relate* calculations of relatedness ( $r$ ) and GenoDive calculations of kinship for each sampling location. Counts of Relatedness ( $r$ ) represent the number of individual pairwise comparisons that had the lowest log-likelihood score for each category, as calculated in *ML-Relate*: UR (most likely unrelated), HS (most likely half-sibs), FS (most likely full-sibs), PO (most likely parent-offspring). Counts of Kinship represent the number of pairwise comparisons that fell within the categories of kinship as described in the text: unrelated (UN),  $k < 0.047$ ; quarter-sib (QS),  $0.047 < k < 0.09375$ ; half-sib (HS),  $0.09375 < k < 0.1875$ ; full-sib (FS),  $0.1875 < k < 0.375$ ; and nearly identical (NI),  $k > 0.375$ . The Total Number of Pairwise Comparisons is the same for both metrics. Also reported are the mean site-specific values of relatedness ( $r$ ), as calculated by taking the mean value of all maximum likelihood estimates of ( $r$ ) for all pairwise individual comparisons within a site (*ML-Relate* Mean ( $r$ )), and the mean values of the Loiselle *et al.* 1995 coancestry metric, as calculated in GenoDive (Loiselle Mean Kin). Site-specific mean ( $r$ ) and mean kin are significantly correlated (Pearson  $R = 0.92$ ,  $P < 0.0005$ ).

| Site | Counts of Relatedness ( $r$ ) |     |    |    | Counts of Kinship |     |     |    |    | Total Number of Comparisons | <i>ML-Relate</i> Mean ( $r$ ) | Loiselle Mean Kin |
|------|-------------------------------|-----|----|----|-------------------|-----|-----|----|----|-----------------------------|-------------------------------|-------------------|
|      | UR                            | HS  | FS | PO | UR                | QS  | HS  | FS | NI |                             |                               |                   |
| CARP | 2415                          | 278 | 8  | 0  | 2125              | 350 | 212 | 12 | 2  | 2701                        | 0.0364                        | 0.0025            |
| SMI  | 2522                          | 312 | 16 | 0  | 2203              | 410 | 218 | 18 | 1  | 2850                        | 0.0396                        | 0.0035            |
| SCI  | 1289                          | 135 | 7  | 0  | 1124              | 213 | 86  | 8  | 0  | 1431                        | 0.0355                        | 0.0016            |
| MLBU | 2243                          | 220 | 22 | 0  | 2019              | 312 | 131 | 18 | 5  | 2485                        | 0.0375                        | 0.0005            |
| SCAT | 2860                          | 358 | 22 | 0  | 2537              | 449 | 237 | 17 | 0  | 3240                        | 0.0433                        | 0.0027            |
| SNI  | 613                           | 82  | 7  | 1  | 526               | 95  | 66  | 16 | 0  | 703                         | 0.0524                        | 0.0056            |
| CLEM | 267                           | 32  | 1  | 0  | 232               | 47  | 19  | 2  | 0  | 300                         | 0.0378                        | 0.0022            |
| CRDO | 1770                          | 174 | 10 | 0  | 1552              | 262 | 124 | 15 | 1  | 1954                        | 0.0361                        | -0.0014           |
| PTN  | 1400                          | 167 | 29 | 0  | 1240              | 221 | 107 | 21 | 7  | 1596                        | 0.0504                        | 0.0078            |
| PBDA | 902                           | 167 | 12 | 0  | 756               | 190 | 112 | 23 | 0  | 1081                        | 0.0575                        | 0.0163            |
| PBJ  | 3882                          | 396 | 93 | 0  | 3573              | 499 | 212 | 74 | 13 | 4371                        | 0.0439                        | 0.0051            |
| IGP  | 2092                          | 241 | 13 | 0  | 1860              | 338 | 142 | 6  | 0  | 2346                        | 0.0404                        | 0.0010            |
| ODL  | 782                           | 77  | 2  | 0  | 717               | 95  | 49  | 0  | 0  | 861                         | 0.0336                        | -0.0013           |
| PE   | 858                           | 128 | 4  | 0  | 777               | 136 | 72  | 5  | 0  | 990                         | 0.0417                        | 0.0037            |
| BTG  | 668                           | 97  | 15 | 0  | 583               | 105 | 74  | 13 | 5  | 780                         | 0.0543                        | 0.0112            |
| ABRE | 1910                          | 227 | 8  | 0  | 1728              | 268 | 139 | 10 | 0  | 2145                        | 0.0391                        | 0.0006            |
| BMG  | 960                           | 118 | 3  | 0  | 907               | 133 | 41  | 0  | 0  | 1081                        | 0.0352                        | 0.0005            |

# Local $F_{ST}$ and $D_{est\_Chao}$ vs. Proportion of Related Individuals ( $r$ )

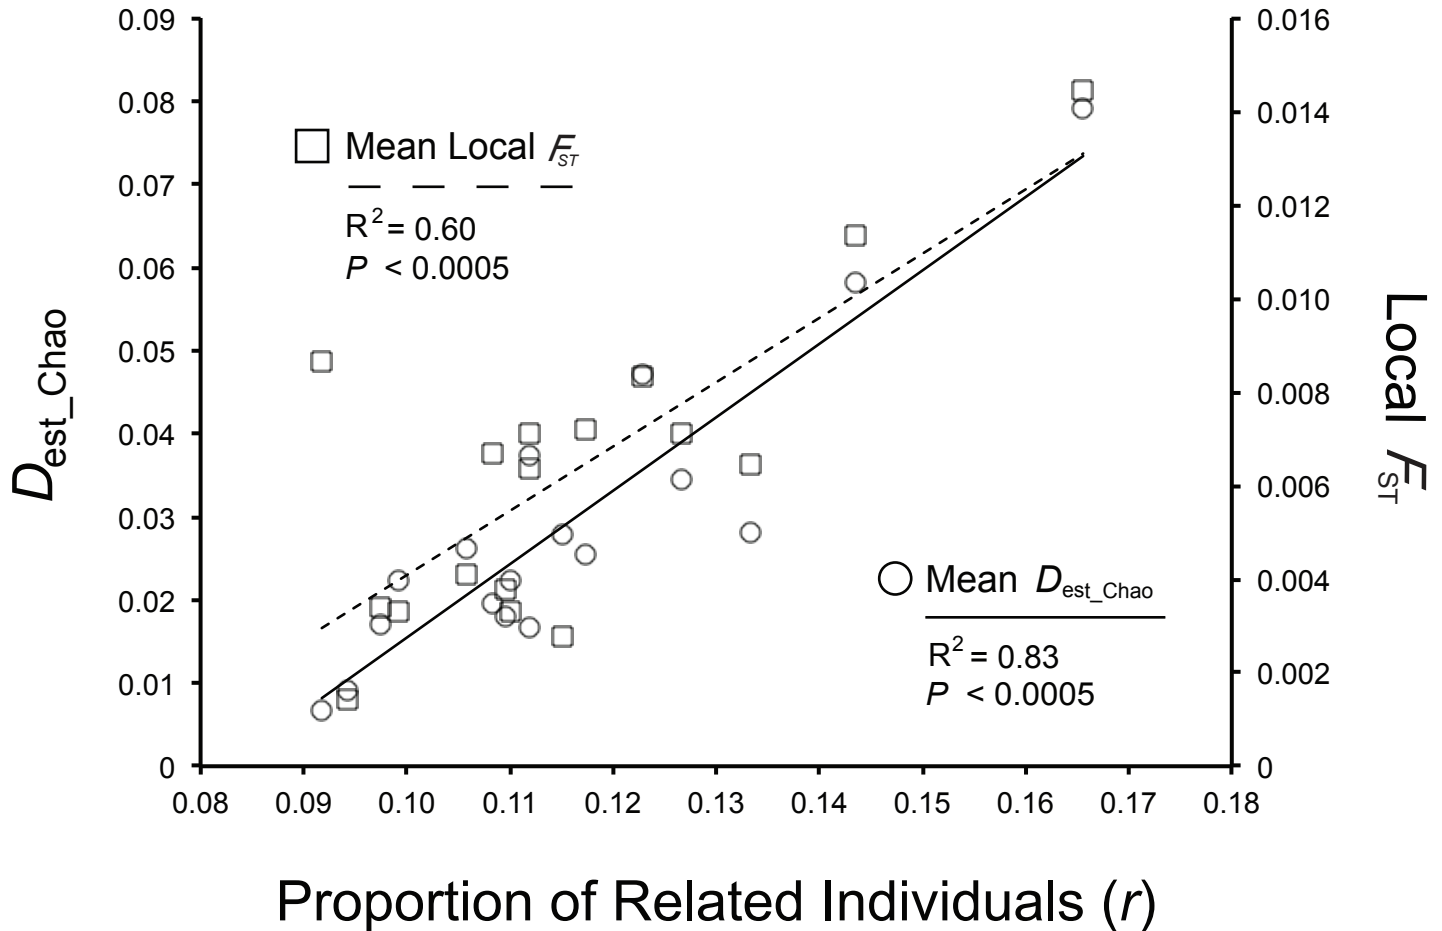

Fig. S1 Linear regression of mean pairwise local  $F_{ST}$  (squares, dashed line) and  $D_{est\_Chao}$  (circles, solid line) at each site for seven microsatellite loci. Both metrics were regressed on the proportion of combined within-site half ( $r = 0.25$ ) and full ( $r = 0.50$ ) sibs as calculated using a maximum likelihood estimation of relatedness ( $r$ ) in *ML-Relate*. Only comparisons where half or full sibs were determined to be both a significant ( $P < 0.05$ ) and the most likely relationship were included. The linear regression of  $F_{ST}$  versus proportion of related individuals, though not shown here, is also significant ( $R^2 = 0.82$ ,  $P < 0.0005$ ).

# Mean Relatedness ( $r$ ) versus Distance from Upwelling

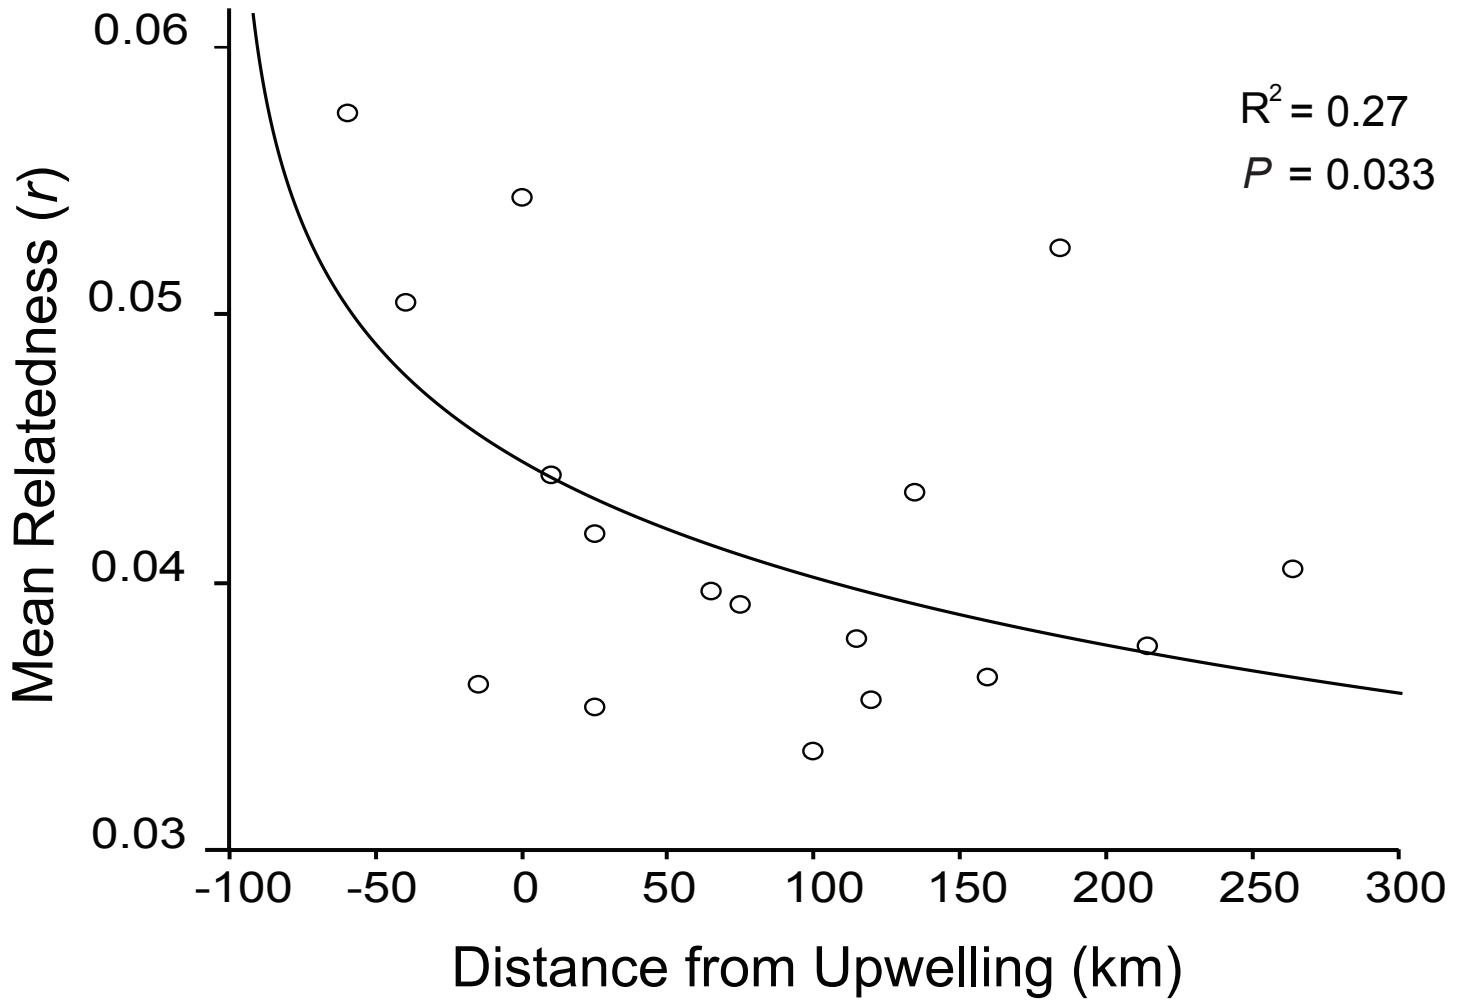

Fig. S2 Log-linear regression of mean relatedness ( $r$ ) at each site on the distance (km) to the nearest edge of an area of high upwelling intensity (from (Fig.6a)).

### Sample Sites

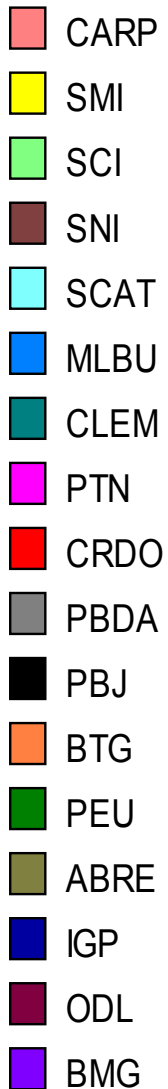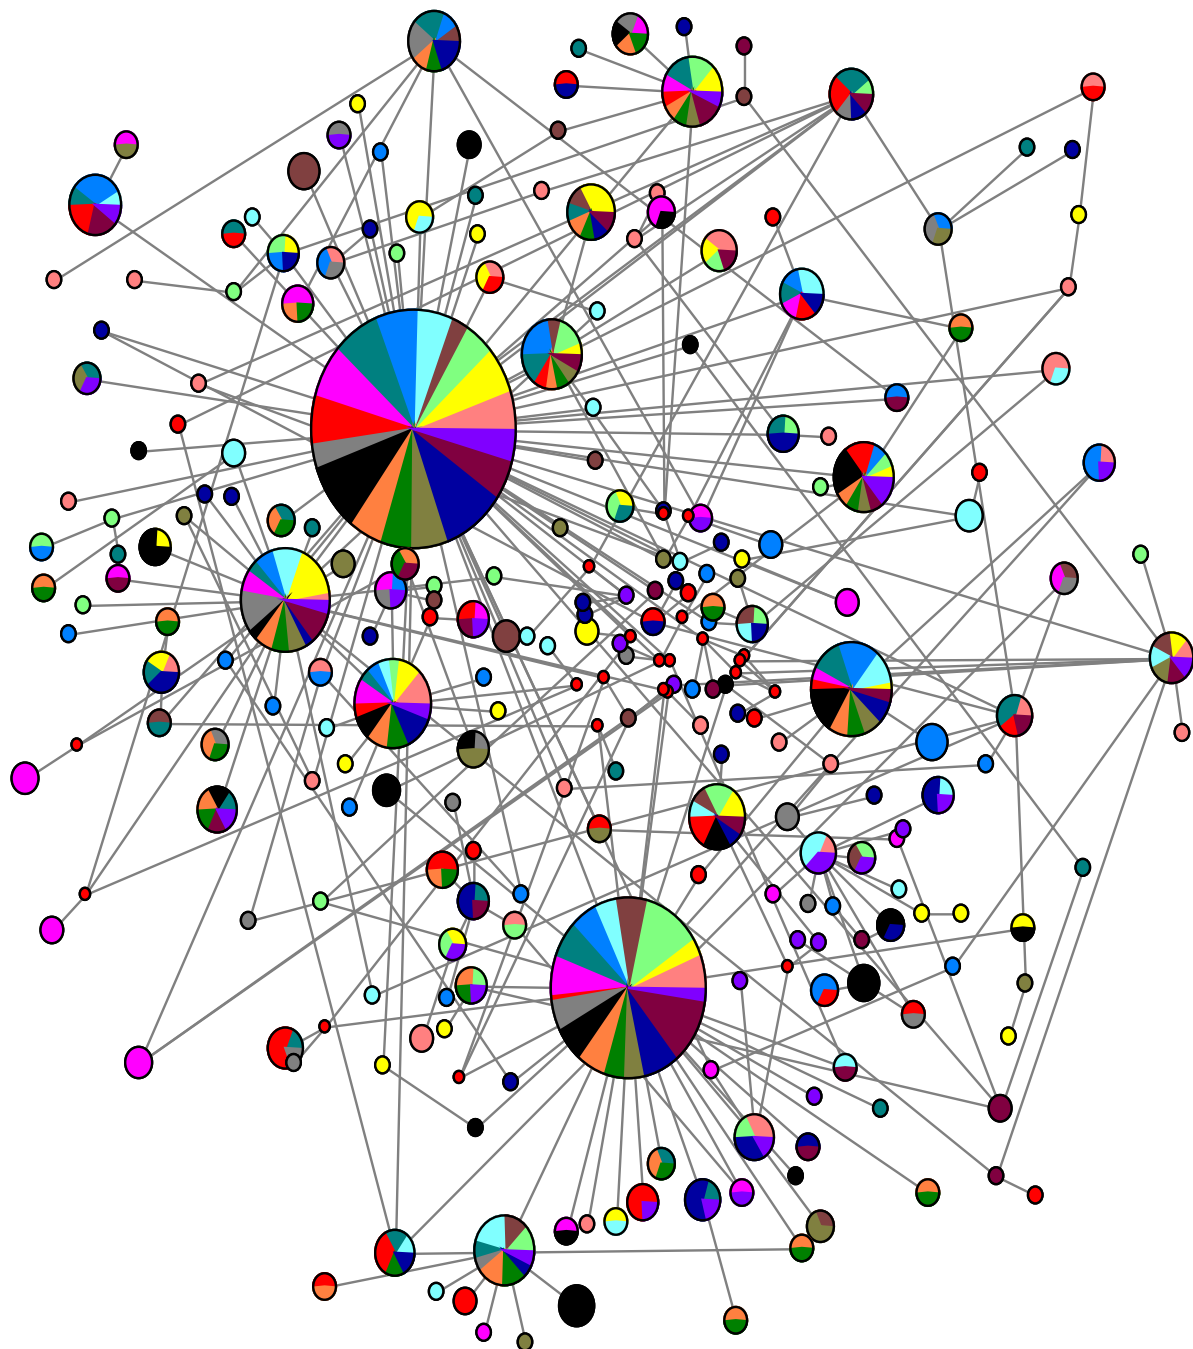

Fig. S3 Median-joining network for *Panulirus interruptus* mtDNA, constructed using 454 base pairs of cytochrome *c* oxidase subunit I (COI) from each of 931 individuals in the program NETWORK. Each circle is a unique haplotype proportional in size to the number of individuals with that haplotype. The two largest circles represent 235 and 95 individuals. The smallest circle represents one individual. Colors correspond to one of 17 locations where the individual haplotypes were found (see key, Fig. 1, Table 1). Lines here are not representative of distance between haplotypes, although most haplotypes only differ by one base pair (see Fig. 2).
